# Supplementary material for: Lactoferrin Induces Erythropoietin Synthesis and Rescues Cognitive Functions in the Offspring of Rats Subjected to Prenatal Hypoxia
Source: MDPI journal article supplement (doi:10.3390/nu14071399), 2022-03-27
Supplement: s1 [file s1]

Figure S1. EPO detection by Western blotting in various tissues of embryos from rats treated differently. # - number of corresponding lanes.

| Groups                                                                                                                |              | Analyzed part of pregnant rats or fetus |                                                                                |                                                                           |                                                                           |  |
|-----------------------------------------------------------------------------------------------------------------------|--------------|-----------------------------------------|--------------------------------------------------------------------------------|---------------------------------------------------------------------------|---------------------------------------------------------------------------|--|
|                                                                                                                       |              | Brain of pregnant females               | Placenta                                                                       | Brain of the embryos                                                      | Torso of the embryos                                                      |  |
| Embryos ( $n = 10$ ) from control pregnant rats ( $n = 2$ ) with <i>i.p.</i> saline injections during gestation       | EPO presence | 0                                       | 0                                                                              | 0                                                                         | 0                                                                         |  |
|                                                                                                                       | EPO absence  | 2<br>(##1, 2)                           | 10<br>(##82, 83, 84, 85, 91, 92, 93, 94, 95, 96)                               | 10<br>(## 73, 74, 75, 76, 77, 78, 79, 86, 87, 88)                         | 10<br>(## 64, 65, 66, 67, 68, 69, 70, 71, 98, 99)                         |  |
| Embryos ( $n = 16$ ) from pregnant rats ( $n = 2$ ) with hypoxia and <i>i.p.</i> saline injections during gestation   | EPO presence | 0                                       | 0                                                                              | 0                                                                         | 0                                                                         |  |
|                                                                                                                       | EPO absence  | 2<br>(##3, 101)                         | 16<br>(## 19, 20, 21, 46, 47, 48, 49, 50, 51, 52, 97, 102, 103, 104, 105, 106) | 16<br>(## 22, 23, 24, 37, 38, 39, 40, 41, 42, 43, 55, 56, 57, 58, 59, 60) | 16<br>(## 10, 11, 12, 13, 14, 15, 25, 28, 29, 30, 31, 32, 33, 34, 61, 62) |  |
| Embryos ( $n = 12$ ) from pregnant rats ( $n = 2$ ) with hypoxia and <i>i.p.</i> apo-rhLF injections during gestation | EPO presence | 2<br>(## 4, 5)                          | 0                                                                              | 12<br>(## 6, 7, 8, 9, 16, 17, 18, 35, 36, 44, 45, 53)                     | 12<br>(## 26, 27, 54, 63, 72, 80, 81, 89, 90)                             |  |
|                                                                                                                       | EPO absence  | 0                                       | 12<br>(##107, 108, 109, 110, 111, 112, 113, 114, 115, 116, 117, 118)           | 0                                                                         | 0                                                                         |  |
